# Supplementary material for: PTPRN2 and PLCβ1 promote metastatic breast cancer cell migration through PI(4,5)P2‐dependent actin remodeling
Source: PubMed Central journal article supplement (PMC4717998; doi:10.15252/embj.201591973), 2015-11-30
Supplement: EMBJ-35-062-s002.pdf [file EMBJ-35-062-s002.pdf]

## Expanded View Figures

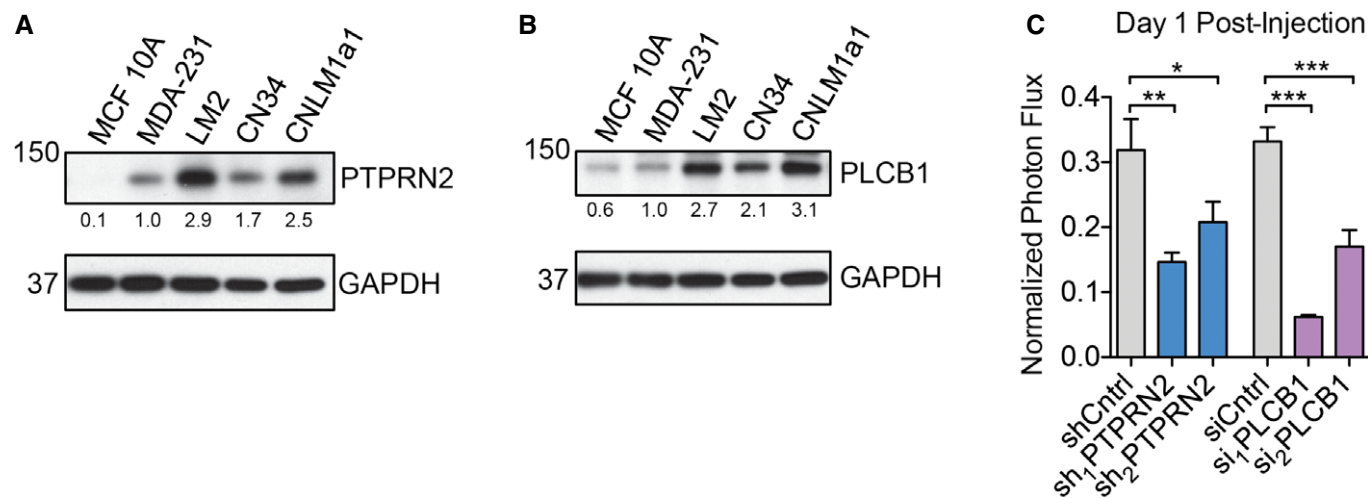

**Figure EV1. PTPRN2 and PLCβ1 promote breast cancer metastasis.**

A, B Western blot analysis of MCF 10A, MDA-MB-231, LM2, CN34, and CNLM1a1 cell lysate using anti-PTPRN2 (A) or anti-PLCβ1 (B). GAPDH was used as a loading control. Densitometry analysis below the blots is adjusted for GAPDH levels and normalized to MDA-MB-231 values.

C Bioluminescence imaging quantification of lung colonization 1 day after injection of 40,000 LM2 cells with knockdown of PTPRN2, PLCβ1, or control cells. For shCntrl, sh<sub>1</sub>PTPRN2:  $N = 5$  mice/group. For sh<sub>2</sub>PTPRN2:  $N = 6$  mice. For siCntrl:  $N = 5$  mice. For si<sub>1</sub>PLCβ1, si<sub>2</sub>PLCβ1:  $N = 6$  mice/group. Error bars represent SEM. \* $P < 0.05$ , \*\* $P < 0.01$ , \*\*\* $P < 0.001$ .

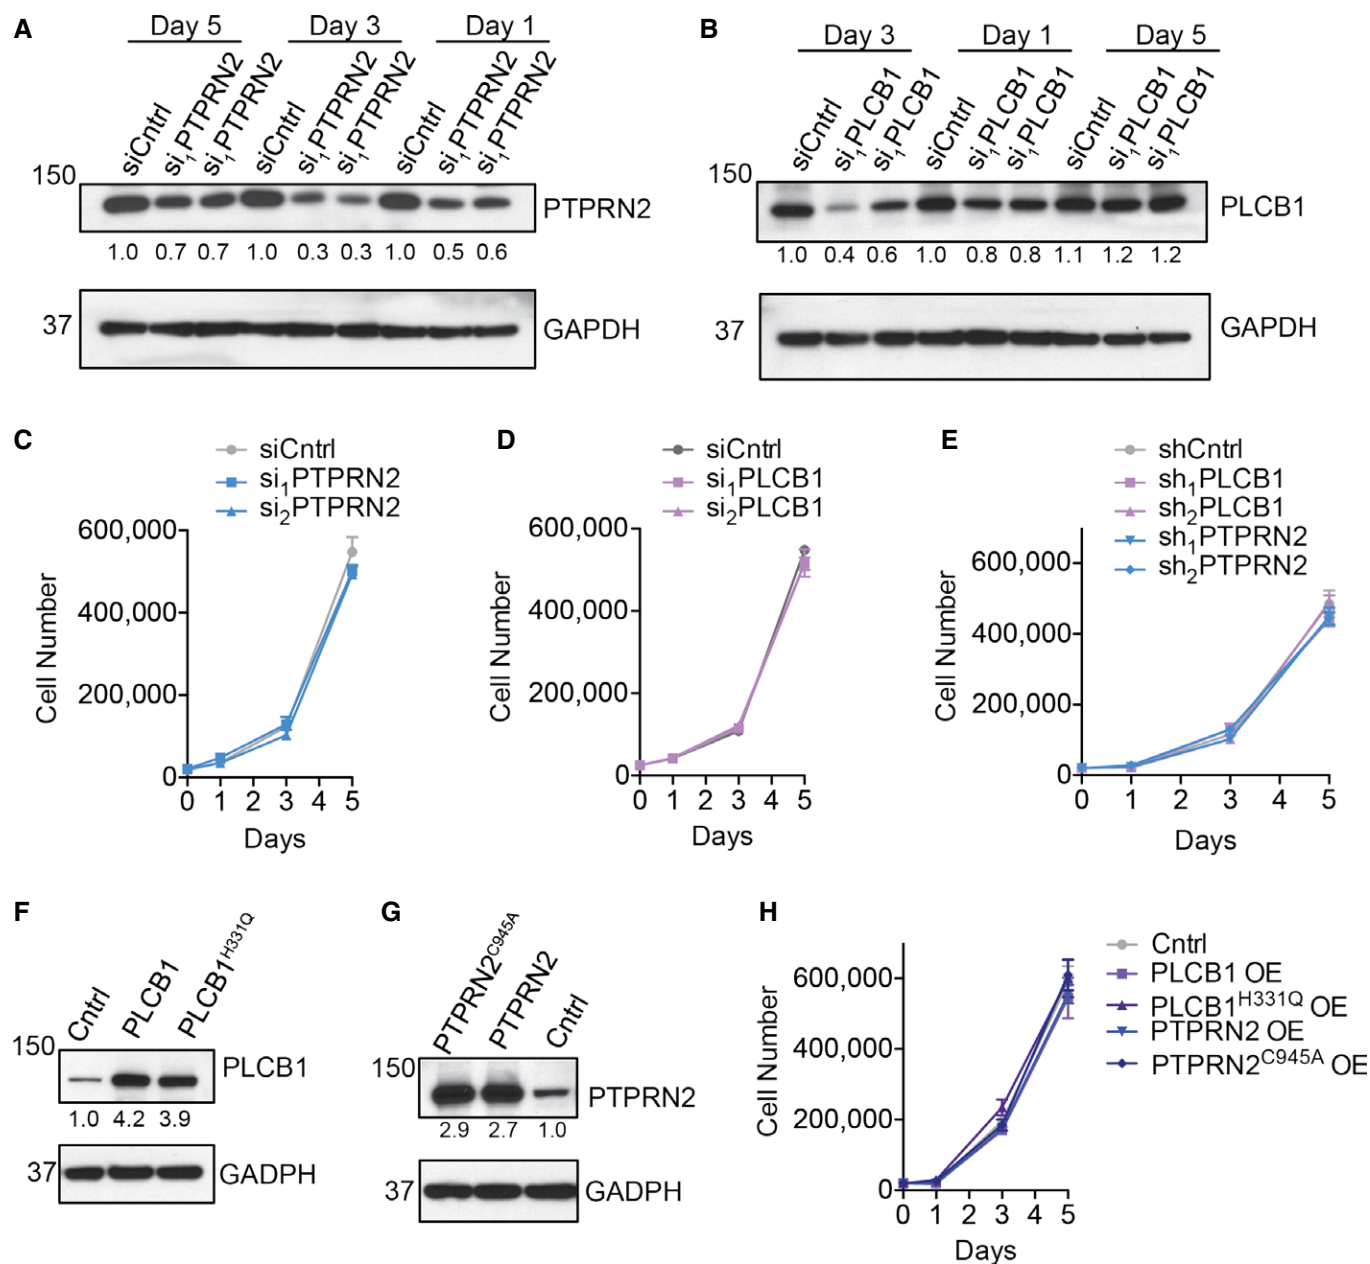**Figure EV2. PLCβ1 and PTPRN2 drive metastatic migration and invasion.**

A, B Western blot analysis of LM2 cells transfected with siRNA targeting PTPRN2, PLCβ1, or a control siRNA using anti-PTPRN2 (A) and anti-PLCβ1 (B) at various time points post-transfection. GAPDH was used as a loading control. Densitometry analysis below the blots is adjusted for GAPDH levels and normalized to siCntrl values on day 1.

C, D Proliferation of 20,000 LM2 cells transfected with siRNA targeting PTPRN2 (C), PLCβ1 (D), or a control siRNA.  $N = 3$  wells/group.

E Proliferation of 20,000 LM2 cells transduced with hairpins targeting PLCβ1, PTPRN2, or a control hairpin.  $N = 3$  wells/group.

F, G Western blot analysis of MDA-MB-231 cells overexpressing PLCβ1, PLCβ1<sup>H331Q</sup> (F), PTPRN2, PTPRN2<sup>C945A</sup> (G), or a control vector using anti-PTPRN2 (F) or anti-PLCβ1 (G). GAPDH was used as a loading control. Densitometry analysis below the blots is adjusted for GAPDH levels and normalized to Cntrl values.

H Proliferation of 20,000 MDA-MB-231 cells overexpressing PLCβ1, PLCβ1<sup>H331Q</sup>, PTPRN2, PTPRN2<sup>C945A</sup>, or a control vector.  $N = 3$  wells/group.

Data information: Error bars represent SEM.

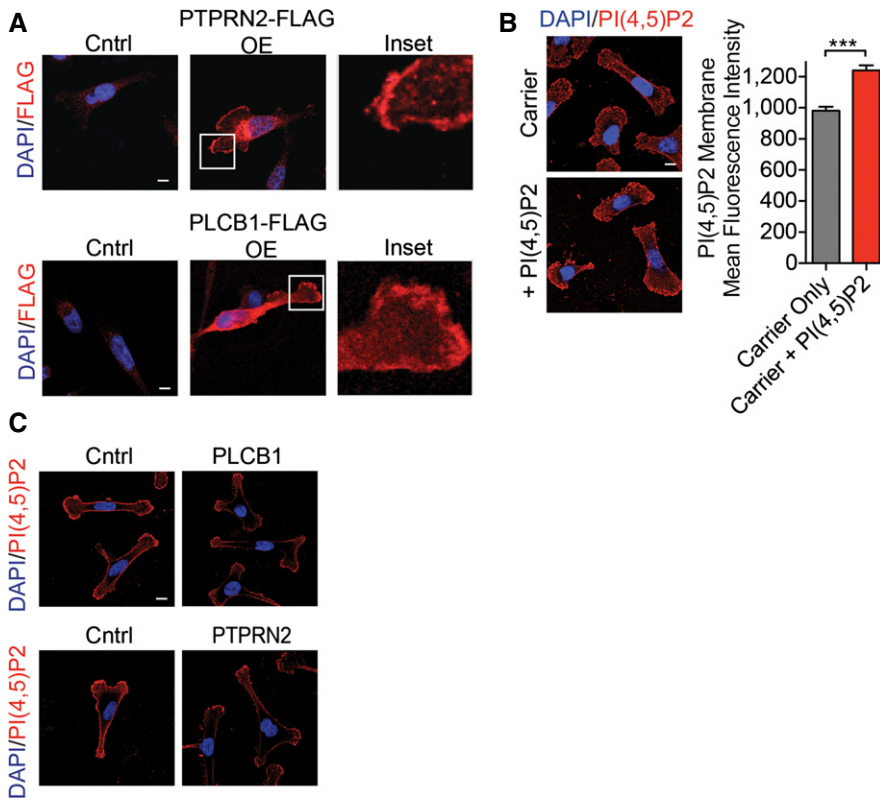

**Figure EV3. PLC $\beta$ 1 and PTPRN2 regulate membrane PI(4,5)P<sub>2</sub> levels.**

- A** Representative images of MDA-MB-231 cells retrovirally transduced with PTPRN2-FLAG, PLC $\beta$ 1-FLAG, or control vector and immunostained with anti-FLAG (red) and DAPI (blue). Scale bar, 10  $\mu$ m.
- B** Mean fluorescence intensity of membrane PI(4,5)P<sub>2</sub> was analyzed in LM2 cells treated with carrier incubated with PI(4,5)P<sub>2</sub> or carrier alone. Cells were immunostained with anti-PI(4,5)P<sub>2</sub> antibody (red) and DAPI (blue) and analyzed using fluorescence microscopy.  $N = 50$  cells/group. Scale bar, 10  $\mu$ m. Error bars represent SEM. \*\*\* $P < 0.001$ .
- C** Representative fluorescence images of MDA-MB-231 overexpressing PTPRN2, PLC $\beta$ 1, or control vector immunostained with anti-PI(4,5)P<sub>2</sub> antibody (red) and DAPI (blue). Scale bar, 10  $\mu$ m.

**Figure EV4. PLC $\beta$ 1 and PTPRN2 facilitate cofilin localization and activity.**

- A** Western blot analysis of whole-cell lysate of LM2 cells transfected with a control siRNA or siRNAs targeting PTPRN2 or PLC $\beta$ 1 using anti-CFL1, anti- $\beta$ -actin, and anti-GAPDH.
- B** Western blot analysis of whole-cell lysate of MDA-MB-231 cells overexpressing PTPRN2, PLC $\beta$ 1, or a control vector using anti-CFL1, anti- $\beta$ -actin, and anti-GAPDH.
- C** LM2 cells transfected with siRNA targeting PTPRN2, PLC $\beta$ 1, or a control siRNA were immunostained for CFL1 (red) and DAPI (blue). Left, quantification of membrane mean fluorescence intensity of CFL1. Right, representative images.  $N = 50$  cells/group. Scale bar, 10  $\mu$ m. Error bars represent SEM. \*\*\* $P < 0.001$ .
- D** MDA-MB-231 cells overexpressing PTPRN2, PLC $\beta$ 1, or a control vector were immunostained for CFL1 (red) and DAPI (blue). Left, quantification of membrane mean fluorescence intensity of CFL1. Right, representative images.  $N = 50$  cells/group. Scale bar, 10  $\mu$ m. Error bars represent SEM. \*\*\* $P < 0.001$ .
- E** Representative images for Fig 5F. LM2 cells were transfected with siRNA targeting PLC $\beta$ 1 or a control siRNA and subjected to the barbed end assay. Cells were stained for biotin-actin (red), DAPI (blue). Scale bar, 20  $\mu$ m.

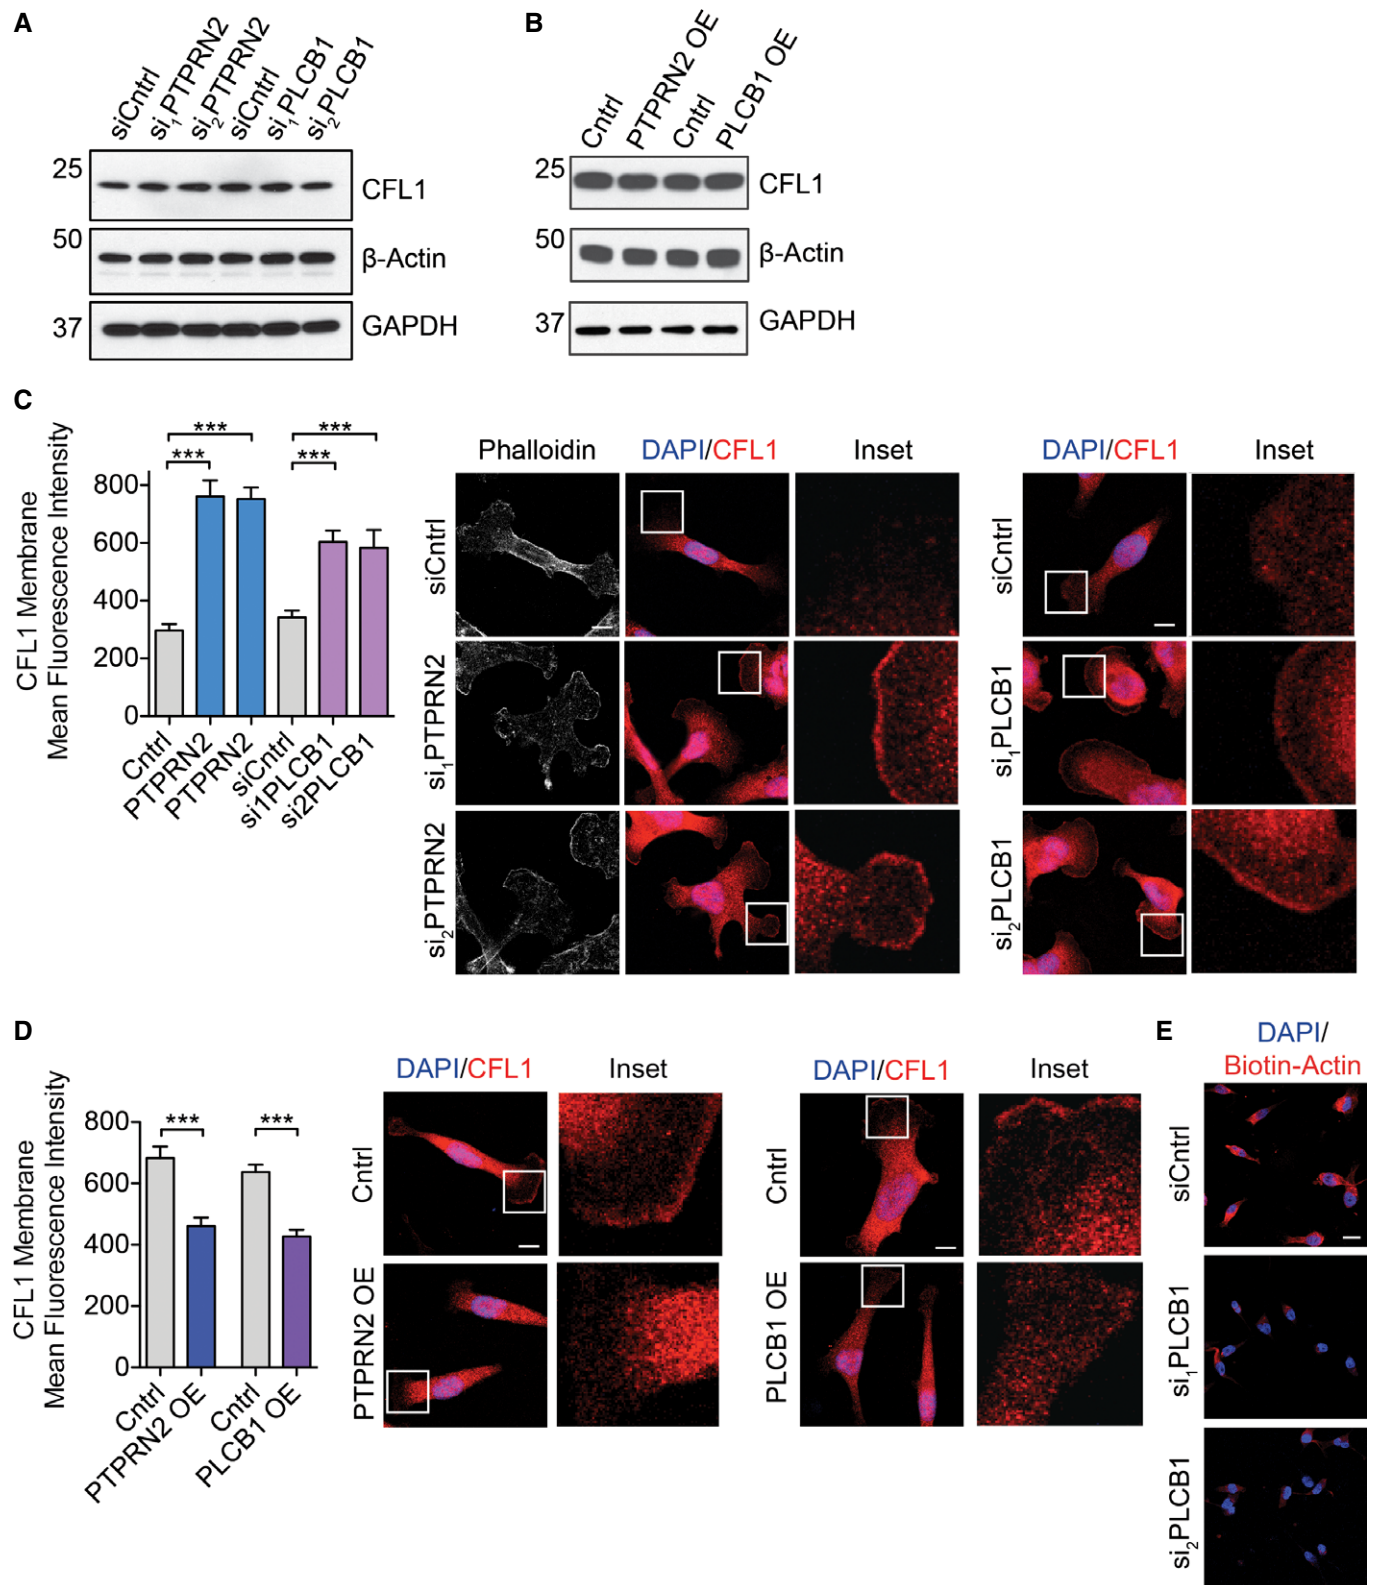

Figure EV4.

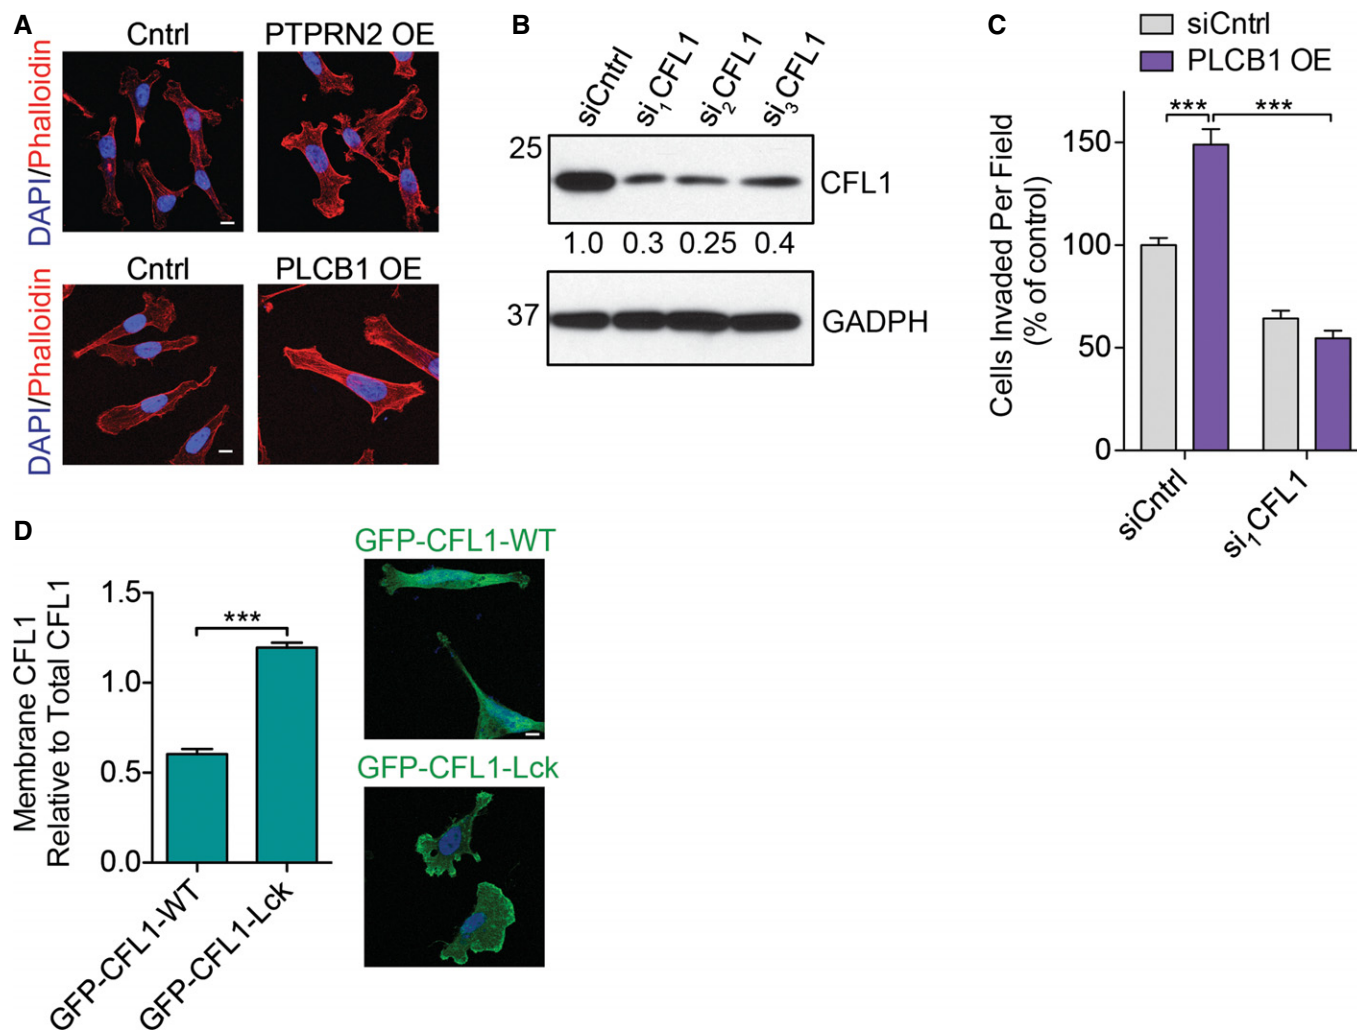

**Figure EV5. PLC $\beta$ 1 and PTPRN2 act upstream of cofilin-mediated actin dynamics.**

**A** Representative images for Fig 6B. MDA-MB-231 overexpressing PTPRN2, PLC $\beta$ 1, or control vector were stained with phalloidin (red) and DAPI (blue) and analyzed using fluorescence microscopy. Scale bar, 10  $\mu$ m.

**B** Western blot analysis of MDA-MB-231 cells transfected with siRNA targeting CFL1 or a control siRNA using anti-CFL1. GAPDH was used as a loading control. Densitometry values below the blot are adjusted for GAPDH levels and normalized to siCntrl value.

**C** MDA-MB-231 cells were transfected with siRNAs targeting CFL1 or a control siRNA in the setting of control or PLC $\beta$ 1 overexpression and subjected to the invasion assay.  $N = 5$  inserts/group. Error bars represent SEM. \*\*\* $P < 0.001$ .

**D** MDA-MB-231 were transfected with siRNA targeting the 3' UTR of *CFL1* to deplete endogenous CFL1 and further transfected with plasmids encoding either GFP-CFL1-WT or GFP-CFL1-Lck (green) and immunostained with DAPI (blue). Left, quantification of membrane mean fluorescence intensity of GFP-CFL1 as analyzed by fluorescence microscopy. Right, representative images.  $N = 50$  cells/group. Scale bar, 10  $\mu$ m. Error bars represent SEM. \*\*\* $P < 0.001$ .
